# Supplementary material for: Autocatalytic Activation of the Furin Zymogen Requires Removal of the Emerging Enzyme's N-Terminus from the Active Site
Source: PLoS One. 2009 Apr 7;4(4):e5031. doi: 10.1371/journal.pone.0005031 (PMC2662429; doi:10.1371/journal.pone.0005031)
Supplement: Table S1 — (0.05 MB DOC) [file pone.0005031.s001.doc]

**Table S1.** **Mass spectrometry analysis of the tryptic peptides of the WT and K117P furins.** Because of the K117/P117 mutation, the D108VYQEPTDPK117 and F118PQQWYLSGVTQR130 tryptic peptides of the K117P mutant cannot be generated and, therefore, these peptides were absent in the K117P samples.

| **Tryptic peptides** | **Trypsin-furin ratio (w/w)** | | | |
| --- | --- | --- | --- | --- |
| **1:1000** | | **1:100** | |
| **WT** | **K117P** | **WT** | **K117P** |
| **D108VYQEPTDPKFPQQWYLSGVTQRDLNVK135** | **=100** | **0** | **=100** | **0** |
| **D108VYQEPTDPKFPQQWYLSGVTQR130** | **=100** | **9** | **=100** | **0** |
| **D108VYQEPTDPK117** | **-** | **-** | **=100** | **0** |
| **F118PQQWYLSGVTQR130** | **=100** | **0** | **=100** | **0** |
| **A136AWAQGYTGHGIVVSILDDGIEK158** | **=100** | **100** | **=100** | **83** |
| **N159HPDLAGNYDPGASFDVNDQDPDPQPR185** | **=100** | **200** | **=100** | **200** |
| **Y186TQMNDNRHGTRCAGEVAAVANNGVCGVGVAYNAR220** | **=100** | **0** | **-** | **-** |
| **Y186TQMNDNR193** | **=100** | **0** | **=100** | **100** |
| **C198AGEVAAVANNGVCGVGVAYNAR220** | **=100** | **80** | **=100** | **111** |
| **I221GGVRMLDGEVTDAVEAR238** | **=100** | **94** | **-** | **-** |
| **M226 LDGEVTDAVEAR238** | **=100** | **100** | **=100** | **94** |
| **S239LGLNPNHIHIYSASWGPEDDGKTVDGPAR** | **=100** | **60** | **=100** | **89** |
| **S239LGLNPNHIHIYSASWGPEDDGK261** | **-** | **100** | **=100** | **250** |
| **L269AEEAFFRGVSQGR282** | **=100** | **127** | **=100** | **0** |
| **L269AEEAFFR276** | **=100** | **60** | **=100** | **64** |
| **G283GLGSIFVWASGNGGR298** | **=100** | **50** | **=100** | **200** |
| **Q350IVTTDLR357** | **-** | **-** | **=100** | **75** |
| **D392MQHLVVQTSKPAHLNANDWATNGVGRK419** | **-** | **-** | **=100** | **100** |
| **D392MQHLVVQTSKPAHLNANDWATNGVGR418** | **=100** | **200** | **=100** | **171** |
| **P403AHLNANDWATNGVGR418** | **-** | **-** | **=100** | **67** |
| **R498GDLAIHLVSPMGTR512** | **-** | **-** | **=100** | **100** |
